# Supplementary material for: Applications of thermodynamic calculations to practical TEG design: Mg2(Si0.3Sn0.7)/Cu interconnections
Source: Royal Society of Chemistry journal article supplement (doi:10.1039/d1ta05289f), 2021-01-01
Supplement: d1ta05289f1.zip [file d1ta05289f1.zip]

# Supplemental information

Applications of thermodynamic calculations to practical TEG design:

$\text{Mg}_2(\text{Si}_{0.3}\text{Sn}_{0.7})/\text{Cu}$  interconnections

Silvana Tumminello,<sup>\*,†</sup> Sahar Ayachi,<sup>†</sup> Suzana G. Fries,<sup>‡</sup> Eckhard Müller,<sup>†,¶</sup> and  
Johannes de Boor<sup>†,§</sup>

<sup>†</sup>*German Aerospace Center, Department of Thermoelectric Materials and Systems,  
Institute of Materials Research, Cologne, North Rhein-Westphalia 51147, Germany*

<sup>‡</sup>*Materials Research Department, Ruhr University Bochum, Bochum, North  
Rhein-Westphalia 44801, Germany*

<sup>¶</sup>*Justus Liebig University Gießen, Institute of Inorganic and Analytical Chemistry, Gießen,  
Hessen 35390, Germany*

<sup>§</sup>*Institute of Technology for Nanostructures, University of Duisburg-Essen, Duisburg, North  
Rhein-Westphalia 47057, Germany*

E-mail: silvana.tumminello@dlr.de

## Mg-Si-Sn calculated isothermal section at 700 °C

The equilibrium calculation at 700 °C is of interest for the sintering step of the alloyed powders of  $\text{Mg}_{2.06}\text{Si}_{0.3}\text{Sn}_{0.665}\text{Bi}_{0.035}$  for n-type and  $\text{Mg}_{1.97}\text{Li}_{0.03}\text{Si}_{0.3}\text{Sn}_{0.7}$  for p-type. Consolidation was done for 20 min and 10 min for n- and p-type, respectively, under vacuum with a pressure of 66 MPa, 1 K/s heating rate using a graphite die.
